# Supplementary material for: Cinobufagin, a bufadienolide, activates ROS-mediated pathways to trigger human lung cancer cell apoptosis in vivo
Source: Royal Society of Chemistry journal article supplement (doi:10.1039/c7ra01085k), 2017-01-01
Supplement: c7ra01085k1.pdf [file c7ra01085k1.pdf]

Supporting information

for

Cinobufagin, a bufadienolide, activates ROS-mediated pathways to trigger human lung cancer cell apoptosis *in vivo*

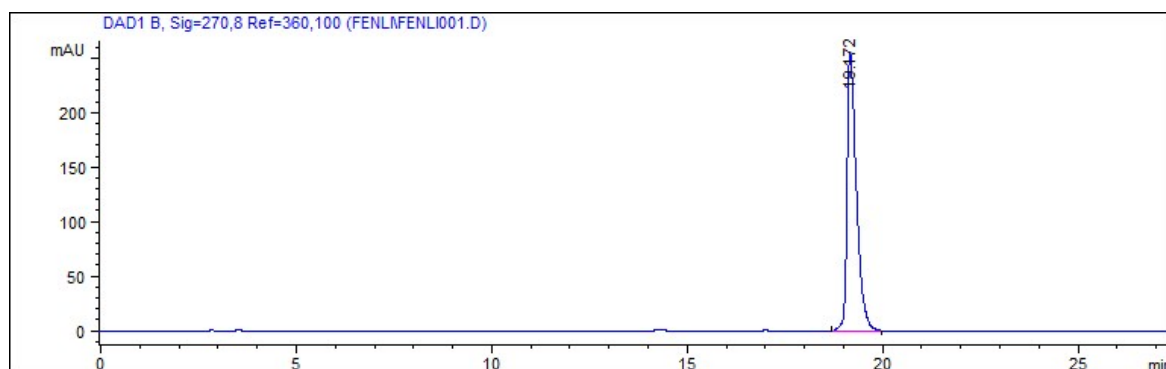

**Figure S1.** Reversed-phase HPLC traces for cinobufagin on Agilent 1100 series instrument.

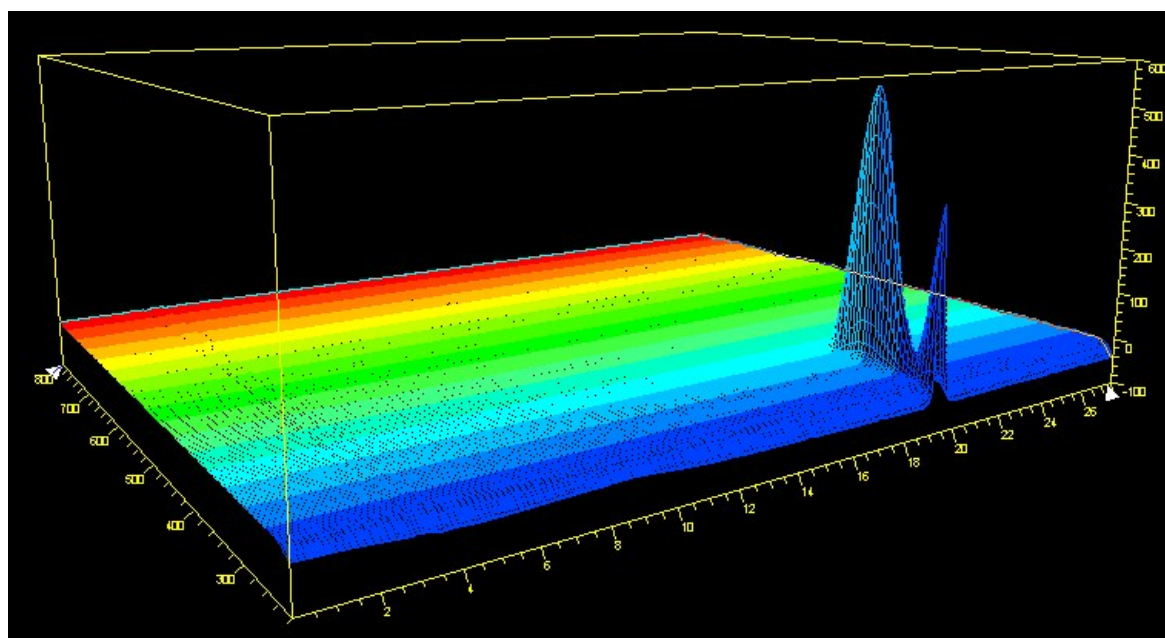

**Figure S2.** 3D spectrum of cinobufagin on Agilent 1100 series instrument.
